# Supplementary material for: The role of human Metapneumovirus genetic diversity and nasopharyngeal viral load on symptom severity in adults
Source: Springer Nature journal article supplement (doi:10.1186/s12985-018-1005-8), 2018-05-23
Supplement: MOESM1 [file 15786124]

**Additional file 1. Coverage of newly designed primers set and probe in 135 HMPV genomes.**

| Primer/<br>Probe | Name*  | Sequence 5' to 3'           | Genetic<br>region | %Coverage (n = 135) |              |
|------------------|--------|-----------------------------|-------------------|---------------------|--------------|
|                  |        |                             |                   | 100%<br>identity    | One mismatch |
| Forward          | 4730f  | CGYAARGCTCCRTGCAAATATGAAG   | <i>M2</i>         | 99.3                | 99.3         |
| Reverse          | 4919r  | CTTCTCTRCCTGDCCTGATATTATTG  | <i>M2</i>         | 100.0               | 100.0        |
| Probe            | 4796fp | FAM-CACAAYTACTGGAGYTGGC-MGB | <i>M2</i>         | 99.3                | 99.3         |

\* Nucleotide location was determined based on NC\_004148.2.
