# Supplementary material for: The role of human Metapneumovirus genetic diversity and nasopharyngeal viral load on symptom severity in adults
Source: Springer Nature journal article supplement (doi:10.1186/s12985-018-1005-8), 2018-05-23
Supplement: MOESM2 [file 15786124]

## Additional file 2. Virological, demographical, and clinical information of patients infected with HMPV.

| No. | Enrollment Date | ID            | HMPV*    |             | Demographics |           |     | Days* | Viral Load*   |                                 | Symptoms |                 |                  |          |             |                     |             | TSSS     |          |
|-----|-----------------|---------------|----------|-------------|--------------|-----------|-----|-------|---------------|---------------------------------|----------|-----------------|------------------|----------|-------------|---------------------|-------------|----------|----------|
|     |                 |               | Genotype | Sub-lineage | Sex          | Ethnicity | Age |       | RNA copies/μl | log <sub>10</sub> RNA copies/μl | Sneezing | Nasal discharge | Nasal congestion | Cough    | Sore throat | Hoarseness of voice | Muscle ache |          | Headache |
|     |                 |               |          |             |              |           |     |       |               |                                 |          |                 |                  |          |             |                     |             |          |          |
| 1   | 27/02/2012      | MY/U27/2012   | A        | Unique A2   | Female       | Chinese   | 64  | 1     | 127.6181      | 2.11                            | None     | Mild            | None             | Severe   | None        | Mild                | None        | Mild     | 6        |
| 2   | 07/03/2012      | MY/U78/2012   | B        | B1          | Male         | Malay     | 26  | 1     | 4688.0552     | 3.67                            | Moderate | Moderate        | Severe           | Severe   | Moderate    | Moderate            | Moderate    | Severe   | 19       |
| 3   | 09/03/2012      | MY/U80/2012   | B        | B1          | Female       | Chinese   | 33  | 1     | 81.3143       | 1.91                            | None     | Severe          | Moderate         | Severe   | None        | Moderate            | Severe      | None     | 13       |
| 4   | 09/03/2012      | MY/U88/2012   | B        | B2          | Female       | Chinese   | 78  | 1     | 3190.3176     | 3.50                            | None     | None            | Mild             | Severe   | None        | Mild                | Severe      | None     | 8        |
| 5   | 16/03/2012      | MY/U134/2012  | B        | B1          | Female       | Malay     | 27  | 1     | 19.7194       | 1.29                            | Severe   | Severe          | Moderate         | Severe   | Severe      | Moderate            | None        | None     | 16       |
| 6   | 21/03/2012      | MY/U167/2012  | B        | B1          | Male         | Malay     | 54  | 3     | 2199.3967     | 3.34                            | Mild     | None            | Mild             | Severe   | Moderate    | Mild                | Severe      | Mild     | 12       |
| 7   | 23/03/2012      | MY/U178/2012  | B        | B1          | Female       | Malay     | 25  | 2     | 18903.066     | 4.28                            | Moderate | Severe          | Severe           | Severe   | Moderate    | Moderate            | None        | Moderate | 17       |
| 8   | 28/03/2012      | MY/U203/2012  | A        | Unique A2   | Female       | Indian    | 54  | 7     | 14050.9       | 4.15                            | Mild     | None            | None             | Mild     | Severe      | Moderate            | Severe      | Severe   | 13       |
| 9   | 28/03/2012      | MY/U207/2012  | B        | B1          | Male         | Malay     | 24  | 4     | 406.5179      | 2.61                            | Mild     | Mild            | Mild             | Moderate | Mild        | Moderate            | Mild        | Moderate | 11       |
| 10  | 13/04/2012      | MY/U288/2012  | B        | B1          | Female       | Malay     | 63  | 3     | 29285.822     | 4.47                            | Mild     | Mild            | None             | Severe   | None        | Mild                | Moderate    | Mild     | 9        |
| 11  | 16/04/2012      | MY/U306/2012  | B        | B1          | Female       | Indian    | 30  | 7     | 276.2403      | 2.44                            | Severe   | Severe          | Severe           | Severe   | Severe      | Severe              | Severe      | Moderate | 23       |
| 12  | 16/04/2012      | MY/U319/2012  | A        | Unique A2   | Female       | Malay     | 32  | 14    | 32.2699       | 1.51                            | Moderate | Moderate        | Moderate         | Moderate | Severe      | Moderate            | None        | Mild     | 14       |
| 13  | 07/05/2012      | MY/U449/2012  | B        | B1          | Female       | Indian    | 59  | 3     | 409.013       | 2.61                            | None     | None            | None             | Severe   | Severe      | Severe              | Severe      | Severe   | 15       |
| 14  | 30/05/2012      | MY/U576/2012  | A        | A2b         | Female       | Chinese   | 69  | 2     | 73.7146       | 1.87                            | Mild     | None            | Mild             | Severe   | Severe      | Mild                | None        | None     | 9        |
| 15  | 11/06/2012      | MY/U663/2012  | B        | B2          | Male         | Chinese   | 86  | 7     | 37.2459       | 1.57                            | None     | Mild            | None             | Moderate | None        | Mild                | None        | None     | 4        |
| 16  | 27/06/2012      | MY/U752/2012  | A        | Unique A2   | Female       | Chinese   | 19  | 2     | 433.3848      | 2.64                            | None     | None            | None             | Severe   | None        | Mild                | None        | None     | 4        |
| 17  | 22/08/2012      | MY/U1021/2012 | B        | B1          | Male         | Indian    | 80  | 8     | 5052.9121     | 3.70                            | Mild     | None            | Moderate         | Moderate | None        | Mild                | Mild        | None     | 7        |
| 18  | 05/09/2012      | MY/U1109/2012 | B        | B1          | Male         | Indian    | 31  | 5     | 1539.801      | 3.19                            | None     | Mild            | Severe           | Severe   | Severe      | Severe              | Severe      | Severe   | 19       |
| 19  | 07/09/2012      | MY/U1122/2012 | A        | A2b         | Female       | Indian    | 23  | 7     | 4702.193      | 3.67                            | None     | Severe          | Moderate         | Severe   | Mild        | Mild                | None        | None     | 10       |
| 20  | 24/09/2012      | MY/U1191/2012 | A        | A2b         | Female       | Indian    | 19  | 4     | 161590.953    | 5.21                            | Mild     | None            | None             | Severe   | Severe      | Moderate            | Severe      | Severe   | 15       |
| 21  | 28/09/2012      | MY/U1219/2012 | B        | B1          | Female       | Malay     | 28  | 3     | 293.412       | 2.47                            | None     | None            | Severe           | Mild     | Severe      | Moderate            | Moderate    | Severe   | 14       |
| 22  | 04/10/2012      | MY/U1239/2012 | B        | B1          | Female       | Malay     | 33  | 3     | 6239.857      | 3.80                            | Moderate | None            | Severe           | Severe   | Mild        | Moderate            | Mild        | Moderate | 14       |
| 23  | 15/10/2012      | MY/U1315/2012 | B        | B2          | Female       | Chinese   | 36  | 5     | 225972.859    | 5.35                            | Severe   | Severe          | Severe           | Mild     | Moderate    | Moderate            | None        | None     | 14       |
| 24  | 12/11/2012      | MY/U1455/2012 | A        | Unique A2   | Female       | Indian    | 46  | 3     | 123368.672    | 5.09                            | Mild     | Moderate        | Moderate         | Severe   | Severe      | Severe              | Severe      | Severe   | 20       |
| 25  | 14/11/2012      | MY/U1468/2012 | A        | A2b         | Female       | Others    | 69  | 3     | 148211.422    | 5.17                            | Mild     | Mild            | None             | Moderate | None        | Mild                | Mild        | Mild     | 7        |
| 26  | 14/11/2012      | MY/U1470/2012 | A        | Unique A2   | Female       | Malay     | 34  | 3     | 427307.594    | 5.63                            | Moderate | Moderate        | Moderate         | Severe   | Severe      | Moderate            | None        | Moderate | 16       |
| 27  | 26/11/2012      | MY/U1560/2012 | A        | Unique A2   | Male         | Others    | 22  | 5     | 433.997       | 2.64                            | None     | Moderate        | Moderate         | Moderate | Moderate    | Moderate            | Moderate    | Moderate | 14       |
| 28  | 30/11/2012      | MY/U1589/2012 | A        | A2b         | Female       | Chinese   | 32  | 4     | 18232.566     | 4.26                            | None     | None            | None             | Mild     | Severe      | Mild                | None        | None     | 5        |
| 29  | 03/12/2012      | MY/U1601/2012 | B        | B1          | Female       | Indian    | 44  | 4     | 11146.397     | 4.05                            | Mild     | Mild            | None             | Moderate | Mild        | None                | None        | None     | 5        |
| 30  | 10/12/2012      | MY/U1634/2012 | A        | A2b         | Female       | Chinese   | 73  | 5     | 327035.406    | 5.51                            | Mild     | None            | None             | Severe   | Moderate    | Moderate            | Moderate    | Mild     | 11       |
| 31  | 17/12/2012      | MY/U1662/2012 | A        | A2b         | Female       | Malay     | 55  | 3     | 4615.89       | 3.66                            | Mild     | Moderate        | None             | Moderate | Mild        | Moderate            | None        | None     | 8        |
| 32  | 24/12/2012      | MY/U1692/2012 | A        | A2b         | Female       | Malay     | 35  | 7     | 732.626       | 2.86                            | Mild     | Severe          | Moderate         | Severe   | Severe      | Moderate            | Severe      | None     | 17       |
| 33  | 24/12/2012      | MY/U1698/2012 | A        | A2b         | Female       | Malay     | 62  | 7     | Not detected  |                                 | None     | None            | None             | Severe   | None        | Mild                | Mild        | Mild     | 6        |
| 34  | 31/12/2012      | MY/U1743/2012 | A        | A2b         | Male         | Malay     | 55  | 7     | 296.544       | 2.47                            | Mild     | Moderate        | None             | Moderate | None        | Mild                | None        | Mild     | 7        |
| 35  | 07/1/2013       | MY/U1784/2013 | B        | B2          | Male         | Others    | 23  | 2     | 1582.9263     | 3.20                            | Mild     | Mild            | None             | Mild     | None        | None                | Mild        | Moderate | 6        |
| 36  | 04/2/2013       | MY/U1928/2013 | A        | A2b         | Female       | Malay     | 32  | 2     | 67.4442       | 1.83                            | Moderate | Moderate        | Moderate         | Severe   | Severe      | Severe              | Mild        | Severe   | 19       |
| 37  | 22/02/2013      | MY/U2016/2013 | A        | A2b         | Male         | Malay     | 22  | 3     | 23689.369     | 4.37                            | Mild     | Mild            | Mild             | Mild     | Mild        | Mild                | Mild        | Mild     | 8        |
| 38  | 27/02/2013      | MY/U2054/2013 | A        | A2b         | Female       | Chinese   | 74  | 7     | 13.154        | 1.12                            | None     | Moderate        | Moderate         | Moderate | None        | None                | Severe      | Mild     | 10       |
| 39  | 06/03/2013      | MY/U2081/2013 | A        | A2b         | Female       | Chinese   | 53  | 7     | 4655.516      | 3.67                            | Mild     | Moderate        | Severe           | Severe   | Mild        | Moderate            | None        | None     | 12       |
| 40  | 11/03/2013      | MY/U2125/2013 | B        | B1          | Male         | Malay     | 59  | 4     | 100.447       | 2.00                            | Mild     | Moderate        | Moderate         | Severe   | Severe      | Moderate            | Moderate    | Mild     | 16       |
| 41  | 15/03/2013      | MY/U2135/2013 | A        | A2b         | Female       | Malay     | 52  | 4     | 613.325       | 2.79                            | Mild     | Mild            | Mild             | Moderate | None        | Mild                | Moderate    | None     | 8        |
| 42  | 15/03/2013      | MY/U2139/2013 | B        | B1          | Female       | Malay     | 29  | 7     | 51.131        | 1.71                            | Mild     | Moderate        | Severe           | Severe   | Moderate    | None                | Mild        | Severe   | 15       |
| 43  | 18/03/2013      | MY/U2151/2013 | A        | Unique A2   | Female       | Malay     | 55  | 7     | 134.615       | 2.13                            | Severe   | Severe          | None             | Severe   | Mild        | Moderate            | Mild        | Mild     | 14       |
| 44  | 20/03/2013      | MY/U2177/2013 | A        | Unique A2   | Male         | Chinese   | 70  | 7     | 24742.322     | 4.39                            | Mild     | Moderate        | Severe           | Moderate | Moderate    | Moderate            | Moderate    | Moderate | 16       |
| 45  | 12/04/2013      | MY/U2281/2013 | A        | A2b         | Female       | Malay     | 42  | 7     | 3878.815      | 3.59                            | None     | Mild            | None             | Severe   | Moderate    | Severe              | Mild        | Moderate | 12       |
| 46  | 12/04/2013      | MY/U2288/2013 | A        | A2b         | Female       | Malay     | 28  | 3     | 65742.992     | 4.82                            | Mild     | Moderate        | Mild             | Moderate | Mild        | Mild                | None        | None     | 8        |
| 47  | 17/04/2013      | MY/U2311/2013 | A        | Unique A2   | Female       | Indian    | 70  | 7     | Not detected  |                                 | Mild     | Mild            | Mild             | Severe   | None        | None                | Mild        | None     | 7        |
| 48  | 22/04/2013      | MY/U2329/2013 | B        | B1          | Male         | Malay     | 33  | 14    | 34.766        | 1.54                            | None     | None            | Moderate         | None     | Severe      | Moderate            | Moderate    | Severe   | 12       |
| 49  | 24/04/2013      | MY/U2333/2013 | B        | B2          | Female       | Indian    | 20  | 7     | 854.278       | 2.93                            | Mild     | Mild            | None             | Severe   | Severe      | Moderate            | Moderate    | Mild     | 13       |
| 50  | 06/05/2013      | MY/U2372/2013 | A        | A2b         | Female       | Malay     | 26  | 2     | 32612.559     | 4.51                            | Mild     | Moderate        | Moderate         | Moderate | Mild        | Mild                | Moderate    | Mild     | 12       |
| 51  | 05/06/2013      | MY/U2472/2013 | B        | B1          | Female       | Indian    | 68  | 2     | 1369.047      | 3.14                            | None     | None            | Mild             | Mild     | Moderate    | Mild                | None        | None     | 5        |
| 52  | 17/06/2013      | MY/U2514/2013 | B        | B1          | Female       | Chinese   | 62  | 1     | 229.908       | 2.36                            | Mild     | Mild            | Mild             | Severe   | None        | Moderate            | None        | None     | 8        |
| 53  | 05/08/2013      | MY/U2658/2013 | B        | B2          | Female       | Chinese   | 74  | 5     | 681.7276      | 2.83                            | Mild     | Mild            | Mild             | Severe   | None        | Moderate            | Severe      | Mild     | 12       |
| 54  | 09/09/2013      | MY/U2776/2013 | A        | A2b         | Male         | Malay     | 47  | 2     | 121305.172    | 5.08                            | Moderate | Moderate        | Moderate         | Severe   | Mild        | Mild                | Moderate    | None     | 13       |
| 55  | 11/09/2013      | MY/U2780/2013 | A        | Unique A2   | Female       | Chinese   | 71  | 7     | 11052.001     | 4.04                            | None     | Severe          | None             | Severe   | None        | Moderate            | None        | Mild     | 9        |

|    |            |               |   |           |        |         |    |    |              |      |          |          |          |          |          |          |          |          |    |
|----|------------|---------------|---|-----------|--------|---------|----|----|--------------|------|----------|----------|----------|----------|----------|----------|----------|----------|----|
| 56 | 23/09/2013 | MY/U2830/2013 | A | A2b       | Male   | Chinese | 30 | 4  | 1866.268     | 3.27 | Moderate | Moderate | None     | Severe   | Severe   | Moderate | Severe   | Mild     | 16 |
| 57 | 25/10/2013 | MY/U2953/2013 | B | B1        | Male   | Indian  | 25 | 7  | 8847.6885    | 3.95 | Severe   | Severe   | Severe   | Severe   | Mild     | Moderate | None     | None     | 15 |
| 58 | 01/11/2013 | MY/U2988/2013 | B | B2        | Male   | Indian  | 75 | 4  | 7222.648     | 3.86 | None     | None     | None     | Severe   | Mild     | None     | Severe   | None     | 7  |
| 59 | 04/11/2013 | MY/U3002/2013 | B | B2        | Female | Malay   | 56 | 3  | 14.986       | 1.18 | Severe   | Severe   | Mild     | Moderate | Moderate | Moderate | Moderate | Moderate | 17 |
| 60 | 08/11/2013 | MY/U3021/2013 | A | Unique A2 | Male   | Chinese | 34 | 2  | 46243.234    | 4.67 | None     | None     | None     | Mild     | None     | None     | Mild     | Severe   | 5  |
| 61 | 13/11/2013 | MY/U3051/2013 | B | B2        | Female | Malay   | 63 | 4  | 683.146      | 2.83 | Mild     | None     | None     | Mild     | None     | Mild     | None     | Mild     | 4  |
| 62 | 15/11/2013 | MY/U3059/2013 | A | Unique A2 | Male   | Indian  | 51 | 2  | 436264.781   | 5.64 | Mild     | Mild     | Moderate | Severe   | None     | Moderate | None     | Mild     | 10 |
| 63 | 25/11/2013 | MY/U3123/2013 | B | B1        | Male   | Malay   | 64 | 7  | 59303.898    | 4.77 | Mild     | Moderate | Mild     | Severe   | Severe   | Moderate | None     | Mild     | 13 |
| 64 | 27/11/2013 | MY/U3126/2013 | B | B1        | Female | Malay   | 51 | 4  | 1771.071     | 3.25 | Mild     | None     | Moderate | Severe   | Severe   | Severe   | Mild     | Severe   | 16 |
| 65 | 27/11/2013 | MY/U3142/2013 | B | B2        | Female | Malay   | 22 | 3  | 34.675       | 1.54 | Severe   | Severe   | Severe   | Severe   | Mild     | Moderate | Moderate | Moderate | 19 |
| 66 | 11/12/2013 | MY/U3206/2013 | B | B1        | Female | Indian  | 75 | 4  | 50904.121    | 4.71 | Moderate | Severe   | Moderate | Severe   | Mild     | Moderate | Severe   | Mild     | 17 |
| 67 | 23/12/2013 | MY/U3280/2013 | B | B2        | Female | Malay   | 22 | 5  | 6155.402     | 3.79 | None     | Mild     | Moderate | Mild     | Moderate | Mild     | Moderate | Severe   | 12 |
| 68 | 10/01/2014 | MY/U3350/2014 | B | B2        | Female | Indian  | 26 | 4  | 1375.908     | 3.14 | Mild     | Mild     | Mild     | Severe   | Moderate | None     | Severe   | Severe   | 14 |
| 69 | 15/01/2014 | MY/U3373/2014 | A | A2b       | Male   | Malay   | 25 | 7  | 23.446       | 1.37 | Mild     | Severe   | Severe   | Severe   | Severe   | Moderate | Severe   | Severe   | 21 |
| 70 | 24/01/2014 | MY/U3417/2014 | B | B1        | Male   | Indian  | 47 | 2  | 731916.625   | 5.86 | Moderate | None     | Moderate | Severe   | Severe   | Severe   | Severe   | Mild     | 17 |
| 71 | 29/01/2014 | MY/U3442/2014 | A | A2b       | Male   | Malay   | 19 | 2  | 469040.906   | 5.67 | Severe   | Mild     | Moderate | Mild     | Mild     | Mild     | None     | None     | 9  |
| 72 | 07/02/2014 | MY/U3466/2014 | B | B2        | Female | Chinese | 21 | 2  | 498311.062   | 5.70 | None     | Severe   | Moderate | Severe   | Mild     | Mild     | None     | Mild     | 11 |
| 73 | 14/02/2014 | MY/U3509/2014 | B | B2        | Female | Malay   | 66 | 3  | Not detected |      | None     | None     | Mild     | Severe   | Severe   | Moderate | Severe   | Moderate | 14 |
| 74 | 17/03/2014 | MY/U3645/2014 | B | B2        | Male   | Indian  | 56 | 7  | 775.8019     | 2.89 | None     | Severe   | Severe   | Severe   | Severe   | Severe   | Severe   | Severe   | 21 |
| 75 | 26/03/2014 | MY/U3700/2014 | A | Unique A2 | Female | Chinese | 25 | 4  | 1568.691     | 3.20 | Severe   | Severe   | Severe   | Severe   | Severe   | Severe   | Severe   | Mild     | 19 |
| 76 | 28/03/2014 | MY/U3711/2014 | A | A2b       | Male   | Malay   | 37 | 3  | 449996.844   | 5.65 | Mild     | Moderate | Moderate | Moderate | Moderate | Moderate | Severe   | Mild     | 15 |
| 77 | 02/04/2014 | MY/U3730/2014 | A | A2b       | Male   | Malay   | 70 | 5  | 209055.219   | 5.32 | Mild     | Mild     | None     | Moderate | Mild     | Mild     | Moderate | Mild     | 9  |
| 78 | 02/04/2014 | MY/U3732/2014 | A | A2b       | Female | Indian  | 60 | 7  | 58324.957    | 4.77 | Mild     | Severe   | None     | Moderate | None     | None     | Severe   | Severe   | 12 |
| 79 | 04/04/2014 | MY/U3735/2014 | A | Unique A2 | Male   | Indian  | 55 | 14 | 110.123      | 2.04 | None     | None     | Moderate | Severe   | Severe   | Mild     | Severe   | Severe   | 15 |
| 80 | 14/05/2014 | MY/U3893/2014 | B | B2        | Male   | Malay   | 54 | 2  | 111.723      | 2.05 | Moderate | None     | None     | Severe   | None     | Moderate | Severe   | Moderate | 12 |
| 81 | 19/05/2014 | MY/U3925/2014 | B | B1        | Male   | Malay   | 44 | 5  | 28361.789    | 4.45 | None     | Mild     | None     | Severe   | Mild     | Mild     | Moderate | Severe   | 11 |

HMPV\*: Detection of HMPV by xTAG RVP *FAST* multiplex RT-PCR assay and PCR assay on F and G genes for phylogenetic classification (1);

Viral Load\*: Viral load quantification by in-house HMPV-specific RT-qPCR assay;

Days\*: Estimated number of days elapsed between symptom onset and enrollment date;

TSSS: Total symptom severity score

Unique A2: Unique A2 sub-lineage

## Reference

1. Chow WZ, Chan YF, Oong XY, Ng LJ, Nor'E SS, Ng KT, et al. Genetic diversity, seasonality and transmission network of human metapneumovirus: identification of a unique sub-lineage of the fusion and attachment genes. *Sci Rep.* 2016;6:27730.
