# Supplementary material for: The role of human Metapneumovirus genetic diversity and nasopharyngeal viral load on symptom severity in adults
Source: Springer Nature journal article supplement (doi:10.1186/s12985-018-1005-8), 2018-05-23
Supplement: MOESM3 [file 15786124]

**A****Amplification Plot**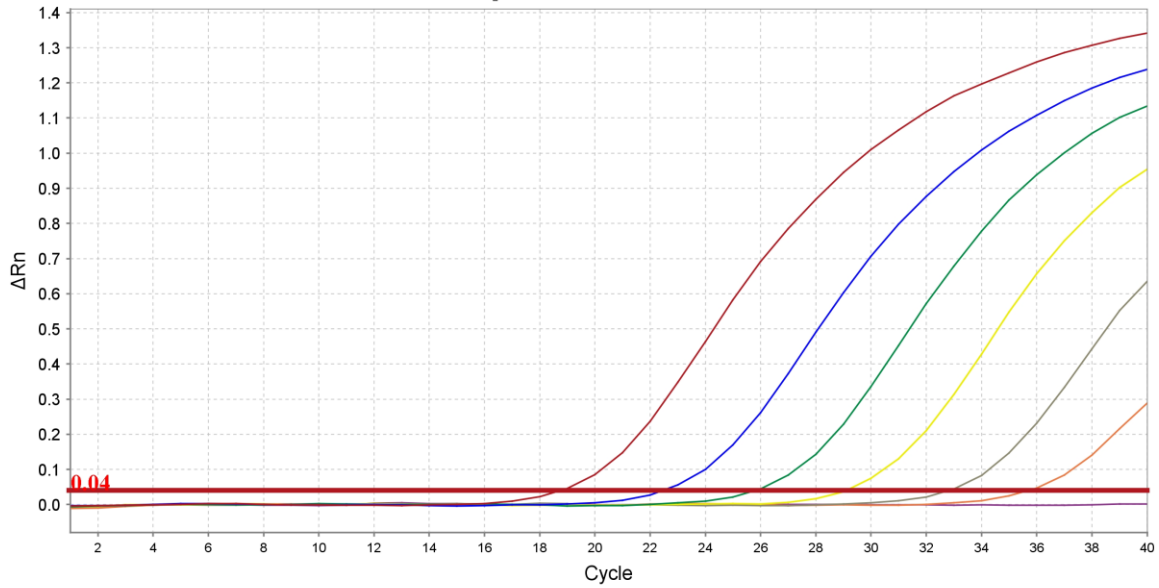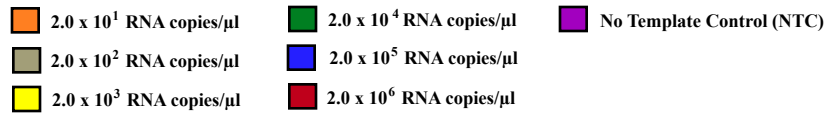**B****Standard Curve**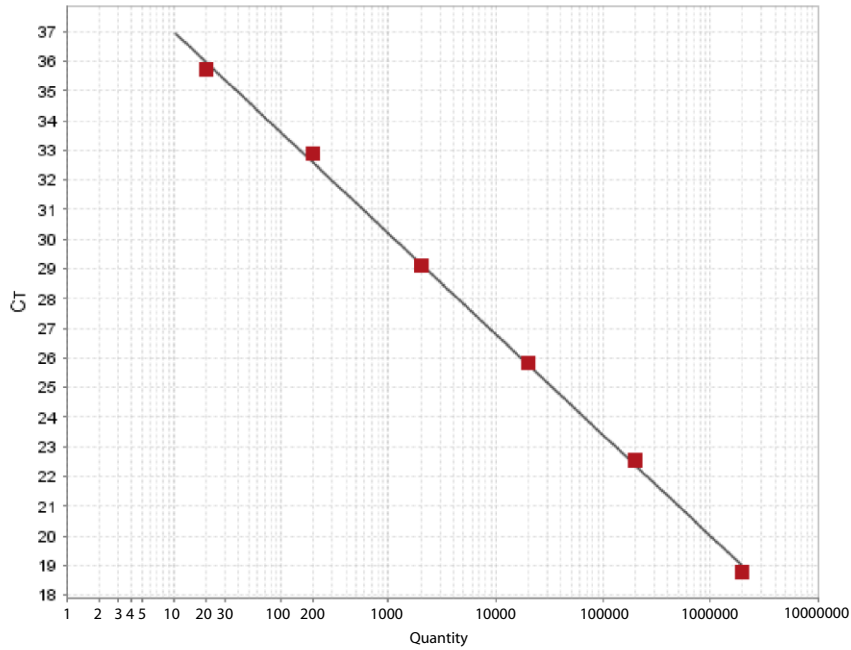

**Target: HMPV FAM**  
**Slope: -3.402**  
**Y-intercept: 40.406**  
**R<sup>2</sup>: 0.999**  
**Efficiency (%): 96.783**  
**Error: 0.055**
