# Supplementary material for: The role of human Metapneumovirus genetic diversity and nasopharyngeal viral load on symptom severity in adults
Source: Springer Nature journal article supplement (doi:10.1186/s12985-018-1005-8), 2018-05-23
Supplement: MOESM4 [file 15786124]

**Additional file 4. Intra and inter variability of the improved RT-qPCR assay for HMPV quantification.**

| Assay                                     | Viral load (RNA copies/ $\mu$ l) |           |           |         |       |       |
|-------------------------------------------|----------------------------------|-----------|-----------|---------|-------|-------|
|                                           | 1                                | 2         | 3         | Mean    | SD    | %CV   |
| <b>Intra</b>                              |                                  |           |           |         |       |       |
| 2.0 x 10 <sup>3</sup> RNA copies/ $\mu$ l | 2,290.023                        | 2,162.963 | 2,112.960 | 2188.65 | 91.28 | 4.17  |
| 2.0 x 10 <sup>1</sup> RNA copies/ $\mu$ l | 20.339                           | 12.047    | 10.420    | 14.27   | 5.32  | 37.28 |
| NTC                                       | Negative                         | Negative  | Negative  |         |       |       |
|                                           |                                  |           |           |         |       |       |
| <b>Inter</b>                              |                                  |           |           |         |       |       |
| 2.0 x 10 <sup>3</sup> RNA copies/ $\mu$ l | 2,290.023                        | 2259.549  | 2435.636  | 2328.40 | 94.11 | 4.04  |
| 2.0 x 10 <sup>1</sup> RNA copies/ $\mu$ l | 20.339                           | 26.870    | 10.090    | 19.10   | 8.46  | 44.29 |

NTC: no template control; SD: standard deviation; CV: coefficient of variance
