# Supplementary material for: The role of human Metapneumovirus genetic diversity and nasopharyngeal viral load on symptom severity in adults
Source: Springer Nature journal article supplement (doi:10.1186/s12985-018-1005-8), 2018-05-23
Supplement: MOESM5 [file 15786124]

### Additional file 5. Viral load of HMPV-infected patients at different periods of enrollment after symptom onset.

| Characteristics             | Estimated no. of days elapsed between symptom onset and enrollment date |                    |        |       |                 |                    |        |       |                |                    |        |                    |                |                    |        |       | p#                       |
|-----------------------------|-------------------------------------------------------------------------|--------------------|--------|-------|-----------------|--------------------|--------|-------|----------------|--------------------|--------|--------------------|----------------|--------------------|--------|-------|--------------------------|
|                             | VL, n=78                                                                |                    |        |       | ≤1-2 Days, n=20 |                    |        |       | 3-5 Days, n=35 |                    |        |                    | ≥ 6 Days, n=23 |                    |        |       |                          |
|                             | mean ± SD                                                               | p*                 | β      | p**   | VL, mean ± SD   | p*                 | β      | p**   | VL, mean ± SD  | p*                 | β      | p**                | VL, mean ± SD  | p*                 | β      | p**   |                          |
| <b>TSSS</b>                 | r = -0.118                                                              | 0.303 <sup>a</sup> | -0.034 | 0.303 | r = 0.038       | 0.873 <sup>a</sup> | 0.012  | 0.873 | r = -0.206     | 0.235 <sup>a</sup> | -0.056 | 0.235              | r = -0.092     | 0.677 <sup>a</sup> | -0.023 | 0.677 |                          |
| mild (1-8), n=19            | 3.43 ± 0.99                                                             | 0.569              | -0.149 | 0.682 | 3.08 ± 0.85     | 0.627              | -0.660 | 0.416 | 3.99 ± 0.81    | 0.380              | 0.112  | 0.818              | 2.58 ± 1.07    | 0.476              | -0.541 | 0.472 | 0.043 <sup>¶</sup>       |
| moderate (9-16), n=45       | 3.58 ± 1.40                                                             |                    | ref.   |       | 3.75 ± 1.91     |                    | ref.   |       | 3.87 ± 1.23    |                    | ref.   |                    | 3.12 ± 1.26    |                    | ref.   |       | 0.271                    |
| severe (17-24), n=14        | 3.15 ± 1.44                                                             |                    | -0.429 | 0.294 | 3.91 ± 1.67     |                    | 0.163  | 0.865 | 3.15 ± 1.59    |                    | -0.718 | 0.290              | 2.39 ± 0.71    |                    | -0.732 | 0.278 | 0.359                    |
| <b>HMPV genotype</b>        |                                                                         |                    |        |       |                 |                    |        |       |                |                    |        |                    |                |                    |        |       |                          |
| A, n=38                     | 3.75 ± 1.40                                                             | 0.065              | -0.549 | 0.065 | 3.78 ± 1.64     | 0.556              | -0.419 | 0.556 | 4.44 ± 1.07    | <b>0.003</b>       | -1.167 | <b>0.003</b>       | 2.99 ± 1.21    | 0.769              | -0.151 | 0.769 | <b>0.015<sup>¶</sup></b> |
| B, n=40                     | 3.20 ± 1.19                                                             |                    | ref.   |       | 3.36 ± 1.48     |                    | ref.   |       | 3.27 ± 1.07    |                    | ref.   |                    | 2.83 ± 1.14    |                    | ref.   |       | 0.583                    |
| <b>HMPV sub-lineage</b>     |                                                                         |                    |        |       |                 |                    |        |       |                |                    |        |                    |                |                    |        |       |                          |
| A2b, n=24                   | 3.86 ± 1.40                                                             | 0.266              | 0.593  | 0.117 | 3.79 ± 1.82     | 0.924              | 0.577  | 0.557 | 4.55 ± 0.96    | 0.024 <sup>‡</sup> | 1.138  | 0.018 <sup>‡</sup> | 2.94 ± 1.24    | 0.915              | -0.079 | 0.907 | 0.040 <sup>¶</sup>       |
| Unique A2 sub-lineage, n=14 | 3.56 ± 1.41                                                             |                    | 0.299  | 0.495 | 3.76 ± 1.67     |                    | 0.545  | 0.603 | 4.14 ± 1.45    |                    | 0.727  | 0.255              | 3.04 ± 1.28    |                    | 0.025  | 0.972 | 0.497                    |
| B1, n=25                    | 3.26 ± 1.16                                                             |                    | ref.   |       | 3.22 ± 1.55     |                    | ref.   |       | 3.41 ± 0.89    |                    | ref.   |                    | 3.02 ± 1.31    |                    | ref.   |       | 0.804                    |
| B2, n=15                    | 3.09 ± 1.28                                                             |                    | -0.172 | 0.689 | 3.61 ± 1.53     |                    | 0.396  | 0.705 | 3.07 ± 1.33    |                    | -0.346 | 0.491              | 2.46 ± 0.77    |                    | -0.555 | 0.532 | 0.534                    |
| <b>Sex</b>                  |                                                                         |                    |        |       |                 |                    |        |       |                |                    |        |                    |                |                    |        |       |                          |
| Male, n= 29                 | 3.63 ± 1.34                                                             | 0.402              | -0.261 | 0.402 | 4.48 ± 1.38     | 0.051              | -1.553 | 0.051 | 3.70 ± 1.15    | 0.814              | 0.105  | 0.814              | 2.87 ± 1.26    | 0.846              | 0.098  | 0.846 | 0.079                    |
| Female, n=49                | 3.37 ± 1.29                                                             |                    | ref.   |       | 2.93 ± 1.33     |                    | ref.   |       | 3.81 ± 1.25    |                    | ref.   |                    | 2.97 ± 1.13    |                    | ref.   |       | 0.064                    |
| <b>Ethnicity</b>            |                                                                         |                    |        |       |                 |                    |        |       |                |                    |        |                    |                |                    |        |       |                          |
| Chinese, n= 19              | 3.37 ± 1.38                                                             | 0.472              | 0.080  | 0.831 | 3.09 ± 1.42     | 0.411              | -0.455 | 0.518 | 4.07 ± 1.16    | 0.785              | 0.494  | 0.402              | 2.95 ± 1.50    | 0.226              | 0.519  | 0.420 | 0.331                    |
| Malay, n=36                 | 3.29 ± 1.40                                                             |                    | ref.   |       | 3.55 ± 1.63     |                    | ref.   |       | 3.58 ± 1.32    |                    | ref.   |                    | 2.44 ± 1.14    |                    | ref.   |       | 0.111                    |
| Indian, n=20                | 3.85 ± 1.09                                                             |                    | 0.565  | 0.129 | 4.88 ± 1.51     |                    | 1.332  | 0.216 | 3.98 ± 0.96    |                    | 0.404  | 0.446              | 3.39 ± 0.88    |                    | 0.954  | 0.089 | 0.106                    |
| Others, n=3                 | 3.67 ± 1.33                                                             |                    | 0.383  | 0.631 | 3.20 ± 0.00     |                    | -0.349 | 0.832 | 3.90 ± 1.79    |                    | 0.327  | 0.726              | 0.00 ± 0.00    |                    | -      | -     | 0.802                    |
| <b>Age</b>                  | r = -0.013                                                              | 0.913 <sup>a</sup> | -0.001 | 0.931 | r = -0.238      | 0.312 <sup>a</sup> | -0.019 | 0.312 | r = 0.097      | 0.579 <sup>a</sup> | 0.006  | 0.579              | r = 0.192      | 0.379 <sup>a</sup> | 0.011  | 0.379 |                          |
| <65 years old, n=64         | 3.43 ± 1.31                                                             | 0.622              | ref.   |       | 3.67 ± 1.60     | 0.395              |        | ref.  | 3.61 ± 1.19    | 0.076              |        | ref.               | 2.91 ± 1.10    | 0.932              |        | ref.  | 0.140                    |
| ≥65 years old, n=14         | 3.62 ± 1.40                                                             |                    | 0.193  | 0.622 | 2.84 ± 0.86     |                    | -0.839 | 0.395 | 4.57 ± 1.03    |                    | 0.959  | 0.076              | 2.97 ± 1.51    |                    | 0.052  | 0.932 | 0.079                    |
| <b>Total, n=78</b>          |                                                                         |                    |        |       | 3.55 ± 1.53     |                    |        |       | 3.77 ± 1.20    |                    |        |                    | 2.93 ± 1.16    |                    |        |       | 0.052                    |

VL: viral load (log<sub>10</sub> RNA copies/μl); TSSS: Total symptom severity score; SD: standard deviation; ref.: category with the highest number of patients is chosen as reference;

p\*: p-value calculated by Independent-Samples t-Test/One-way ANOVA to determine significant mean differences between groups;

<sup>†</sup>p-value calculated by bivariate correlations; r: Pearson's correlation coefficient;

p\*\*<sup>†</sup>: p-value calculated by simple linear regression; β: linear regression coefficient

p#<sup>†</sup>: p-value calculated by One-way ANOVA to determine significant mean differences between different periods of enrollment after onset of symptoms;

Statistically significant comparisons (p < 0.05) are in bold;

¶: p-value for significance was adjusted by Bonferroni correction to p < 0.0167 (0.05/3);

‡: p-value for significance was adjusted by Bonferroni correction to p < 0.0083 (0.05/6).
